# Supplementary material for: Synthesis and structural reconfirmation of bacillamide B
Source: Royal Society of Chemistry journal article supplement (doi:10.1039/c5ob00093a), 2015-01-01

## Supporting Information

### Synthesis and structural reconfirmation of bacillamide B

Xue Sun<sup>a,c</sup>, Yi Liu<sup>a,b,c</sup>, Jun Liu<sup>a</sup>, Guofeng Gu<sup>d</sup> and Yuguang Du<sup>\*a,b,c</sup>

<sup>a</sup>State Key Laboratory of Environmental Chemistry and Eco-toxicology, Research Center for Eco-Environmental Sciences, Chinese Academy of Sciences, Beijing 100085, China; <sup>b</sup>National Engineering Research Center for Carbohydrate Synthesis, Jiangxi Normal University, Nanchang 330022, Jiangxi, China; <sup>c</sup>School of Chemistry and Chemical Engineering, University of Chinese Academy of Sciences, Beijing 100049, China; <sup>d</sup>National Glycoengineering Research Center, Shandong University, Jinan 250100, PR China.

E-mail: duyuguo@rcees.ac.cn.

### Contents

|                                                                                             |           |
|---------------------------------------------------------------------------------------------|-----------|
| <b>1. Chirality analysis by HPLC with chiral modified column for (R/S)-bacillamide B...</b> | <b>S2</b> |
| <b>2. CD spectra of (R/S)-bacillamide B.....</b>                                            | <b>S4</b> |
| <b>3. Copies of NMR Spectra.....</b>                                                        | <b>S6</b> |

# 1. Chirality analysis by HPLC with chiral modified column for (*R/S*)-Bacillamide B

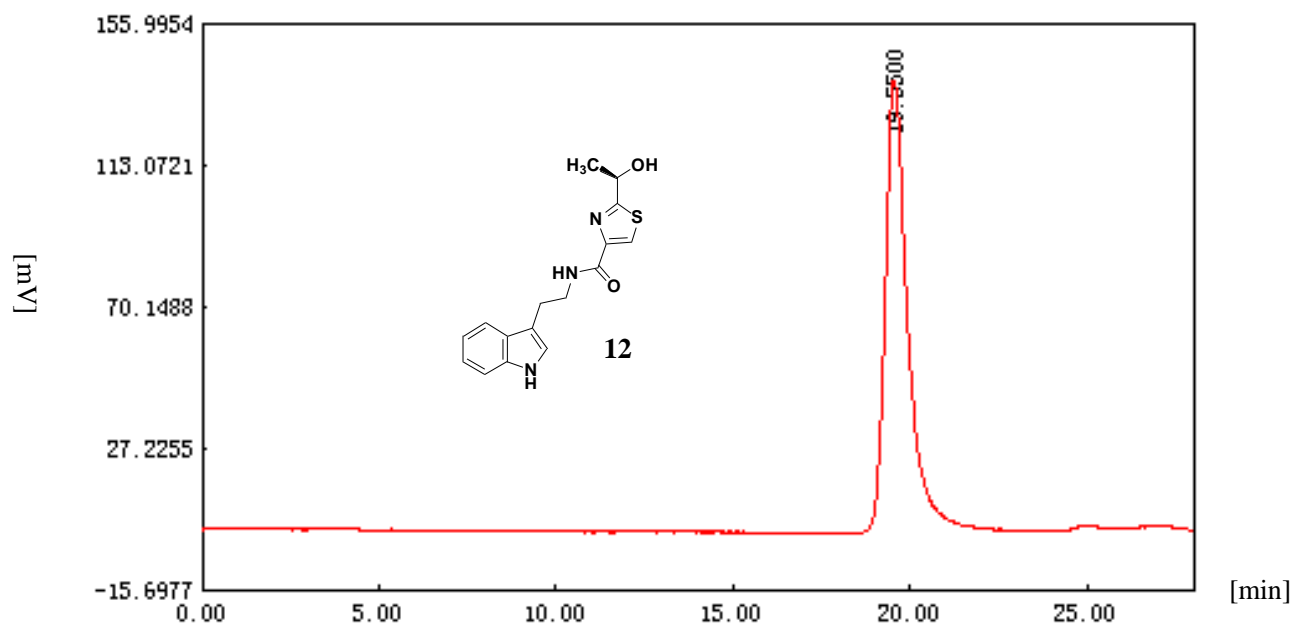

(*R*)-Bacillamide B (**12**) from our route

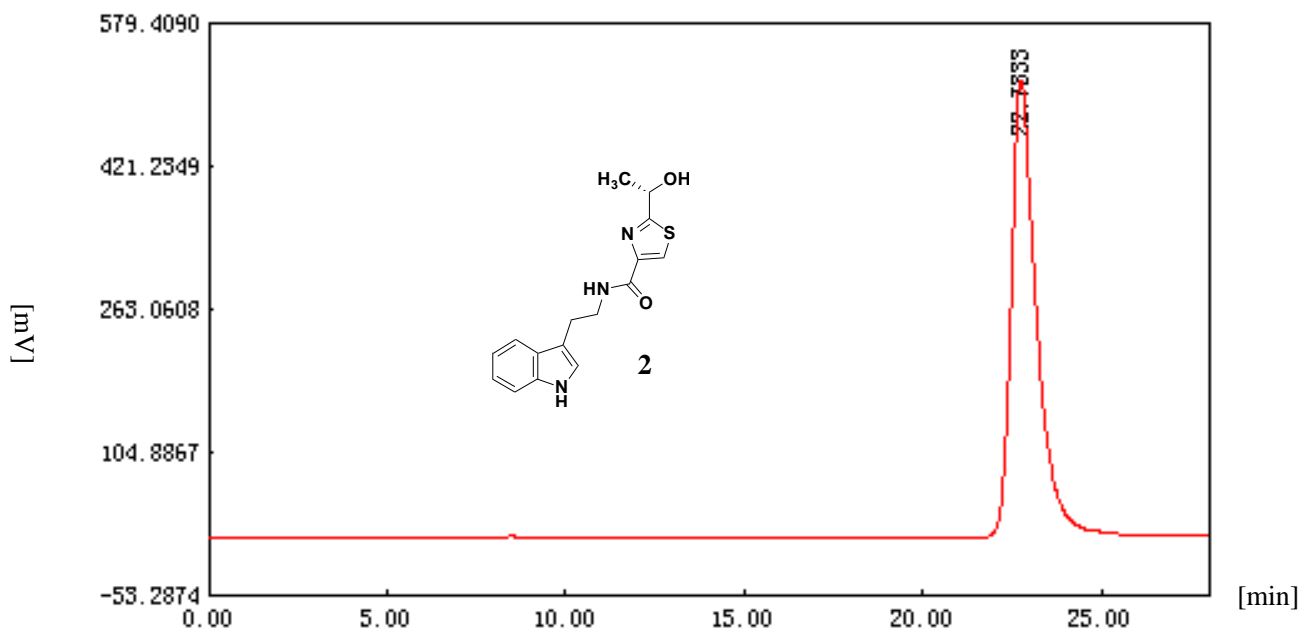

(*S*)-Bacillamide B (**2**) from our route

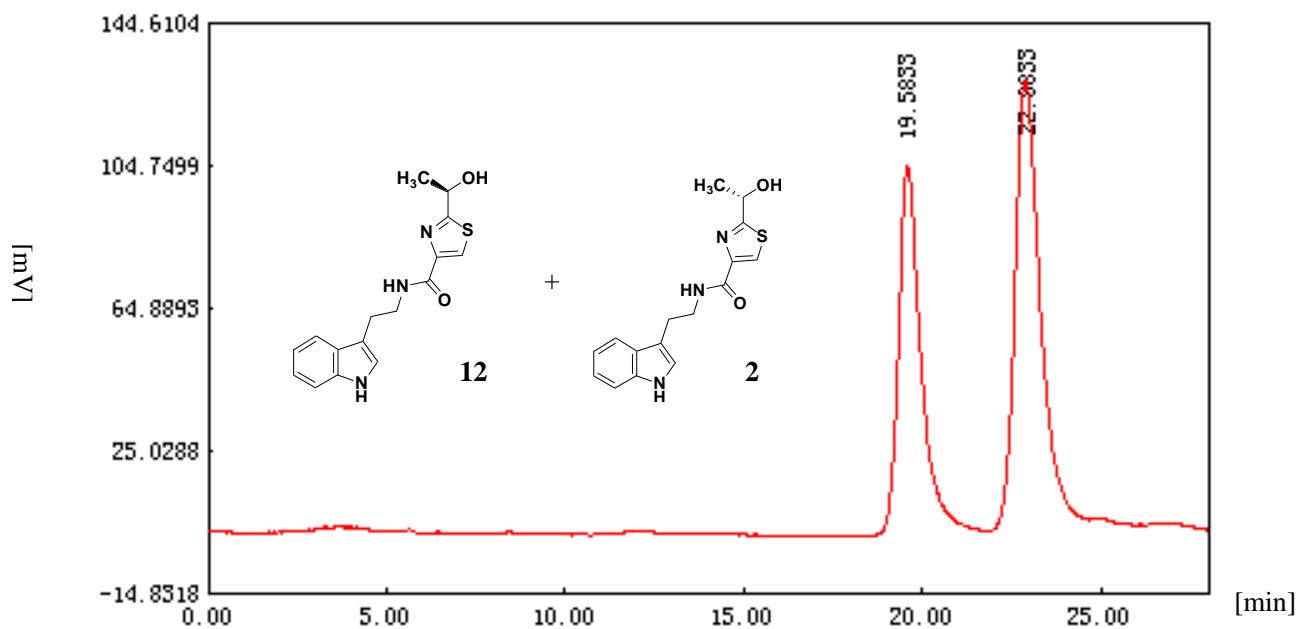

Mixture of (*R/S*)-Bacillamide B (**12** + **2**) from our route

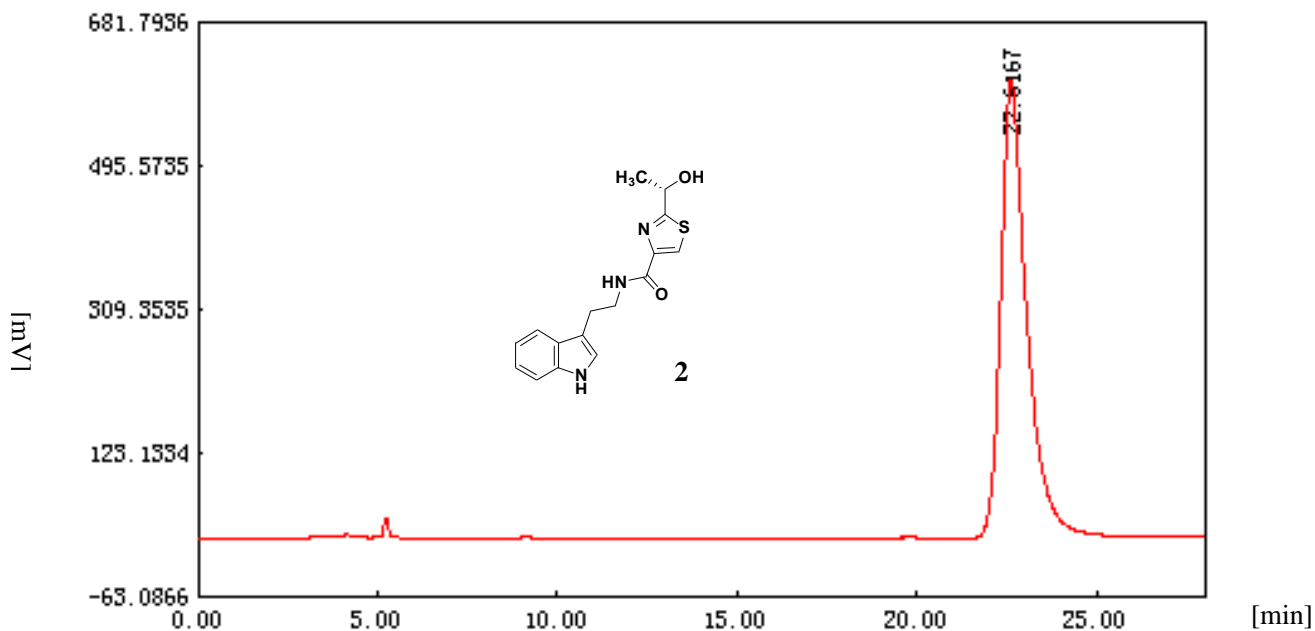

(S)-Bacillamide B (2) from repeating Bray's route

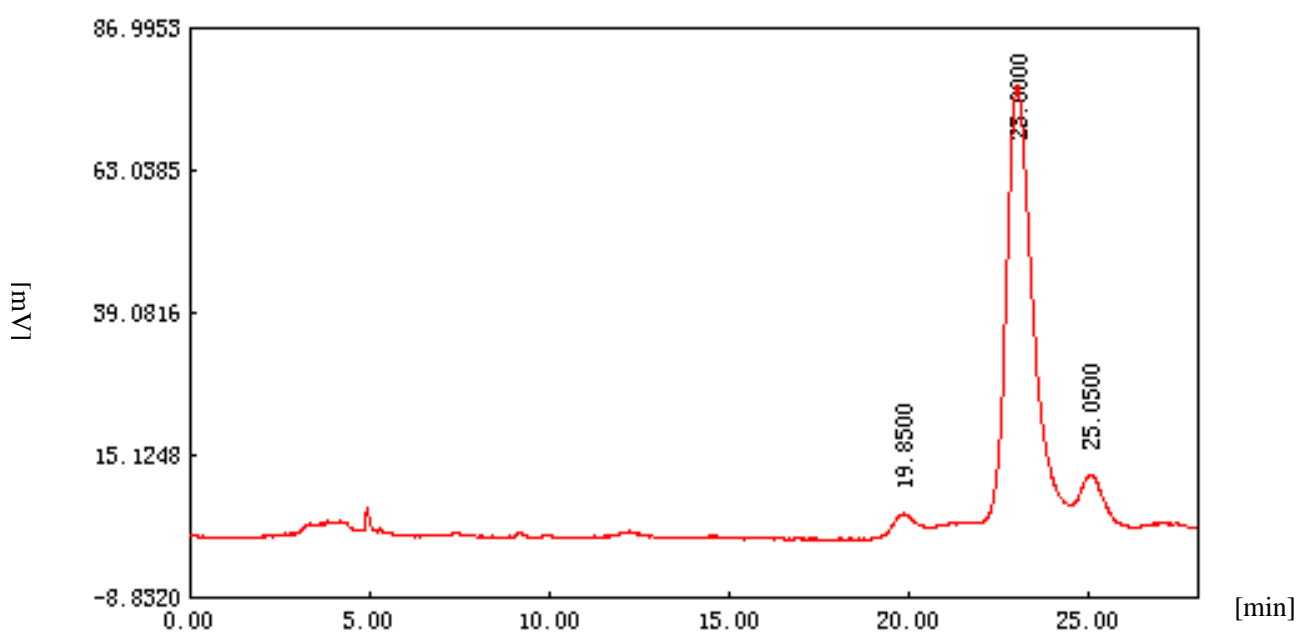

Natural product Bacillamide B provided by Li's group

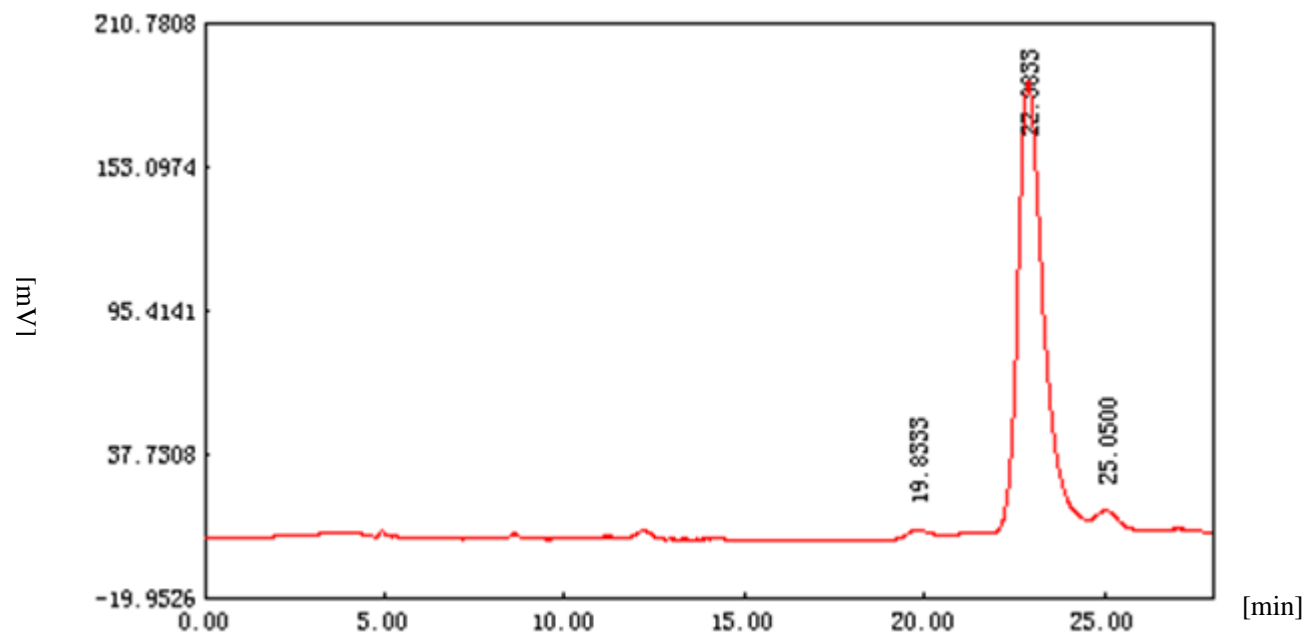

Mixture of natural product Bacillamide B provided by Li's group with  
(S)-Bacillamide B (2) from our route

## 2. CD spectra of (*R/S*)-Bacillamide B

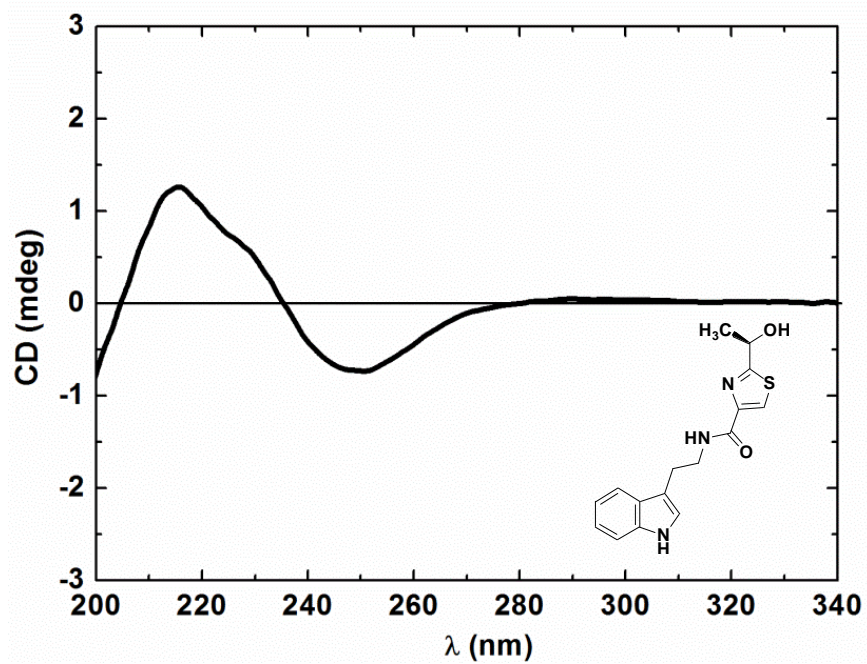

(*R*)-Bacillamide B (**12**) from our route

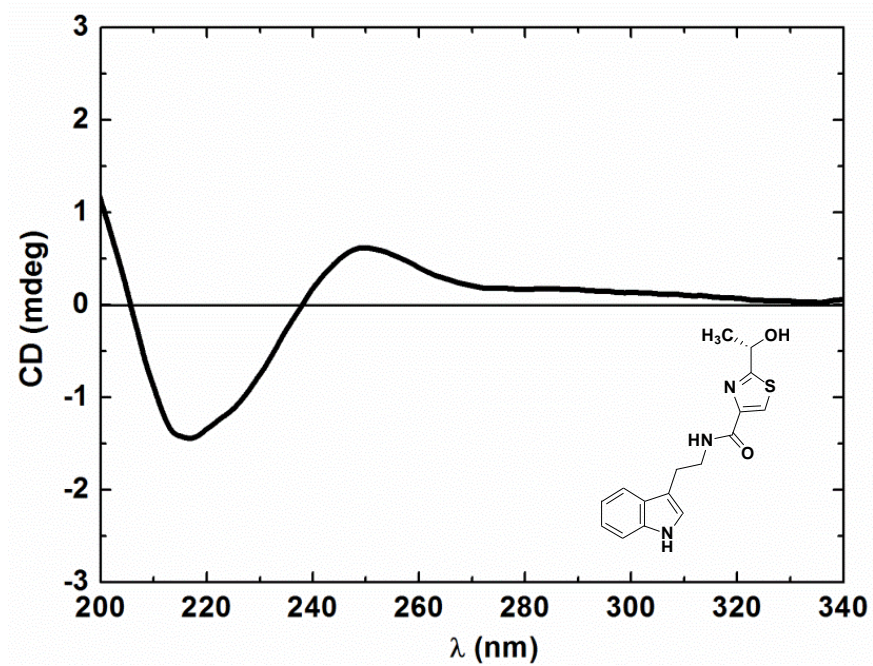

(*S*)-Bacillamide B (**2**) from our route

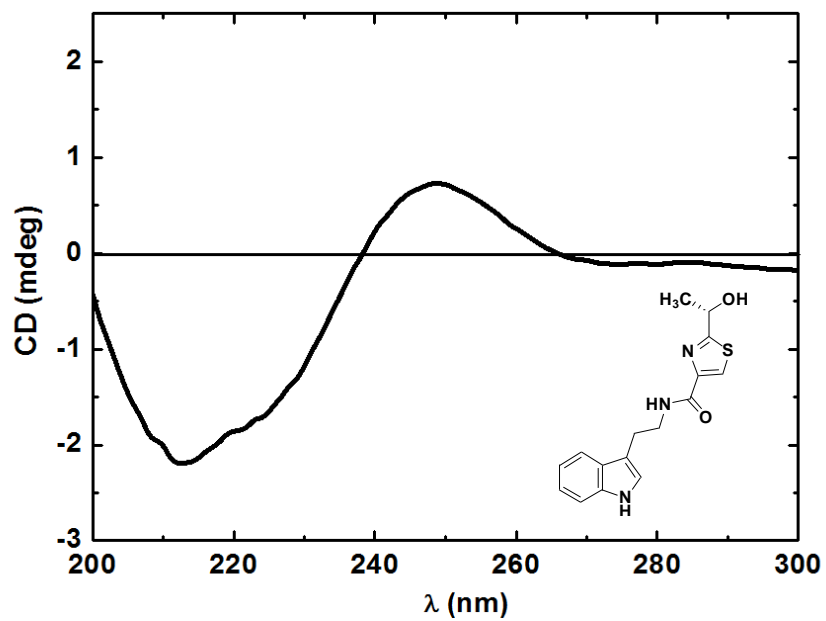

(S)-Bacillamide B (**2**) from repeating Bray's route

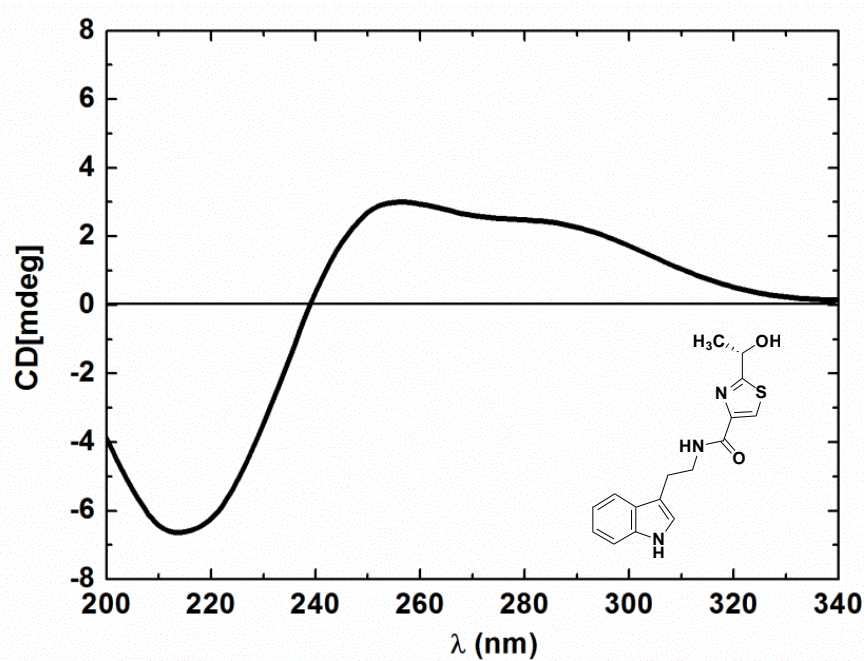

Natural product Bacillamide B provided by Li's group

### 3. Copies of NMR Spectra

#### $^1\text{H}$ NMR (400MHz, $\text{CDCl}_3$ ) spectrum of 7

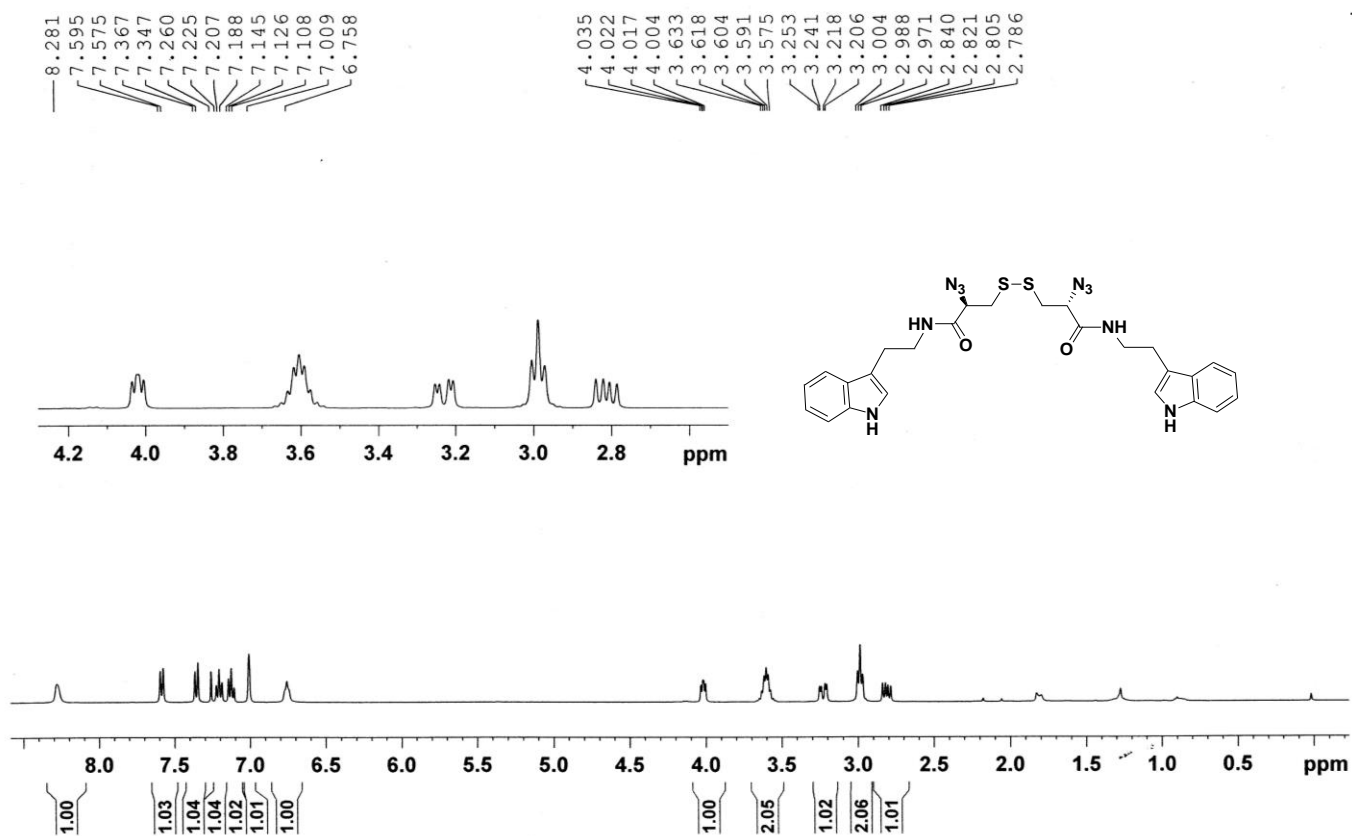

#### $^{13}\text{C}$ NMR (100MHz, $\text{CDCl}_3$ ) spectrum of 7

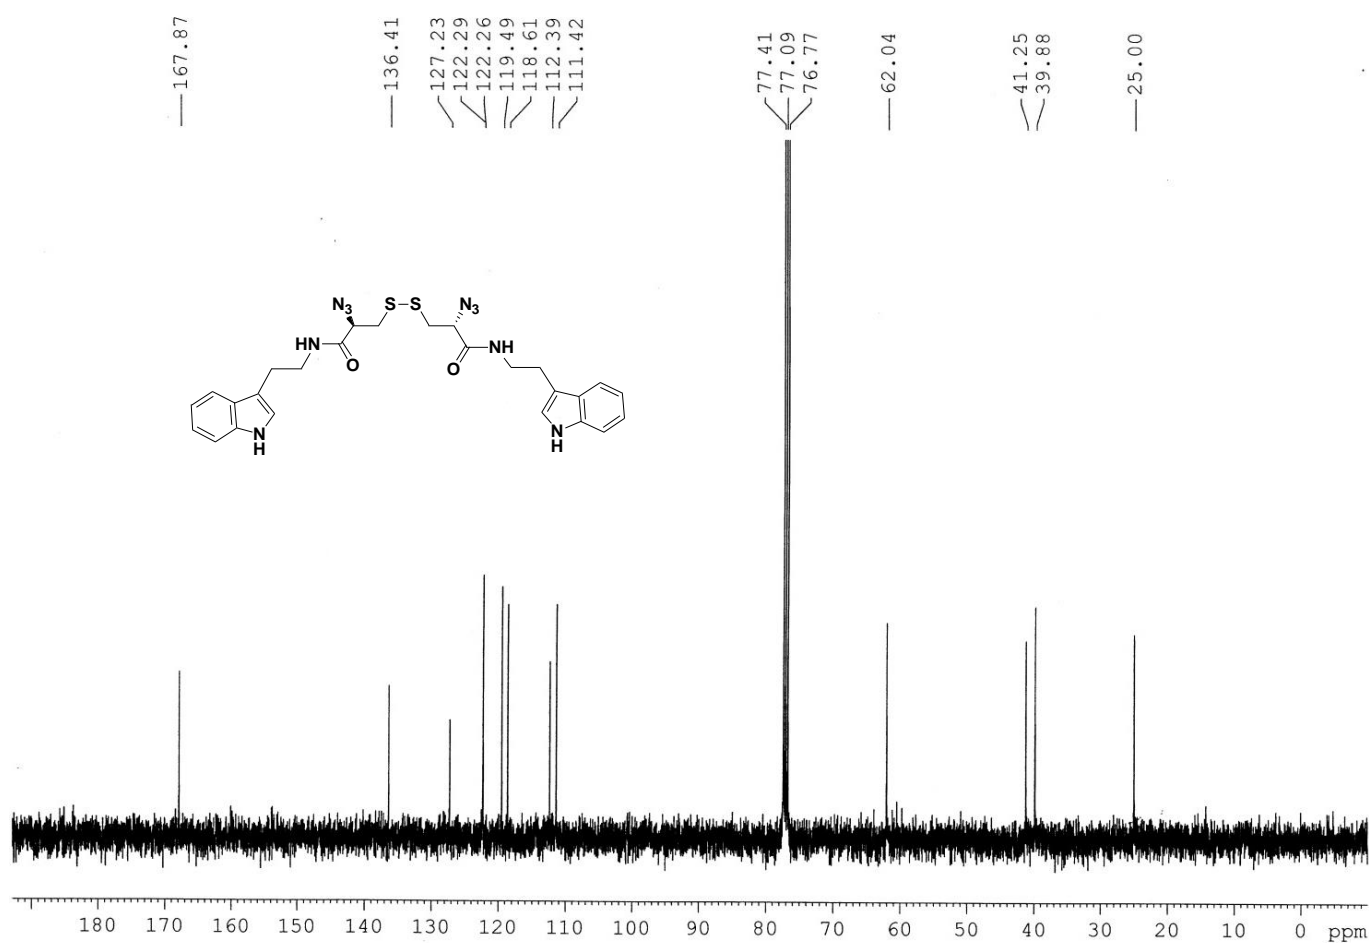

<sup>1</sup>H NMR (400MHz, CDCl<sub>3</sub>) spectrum of 8

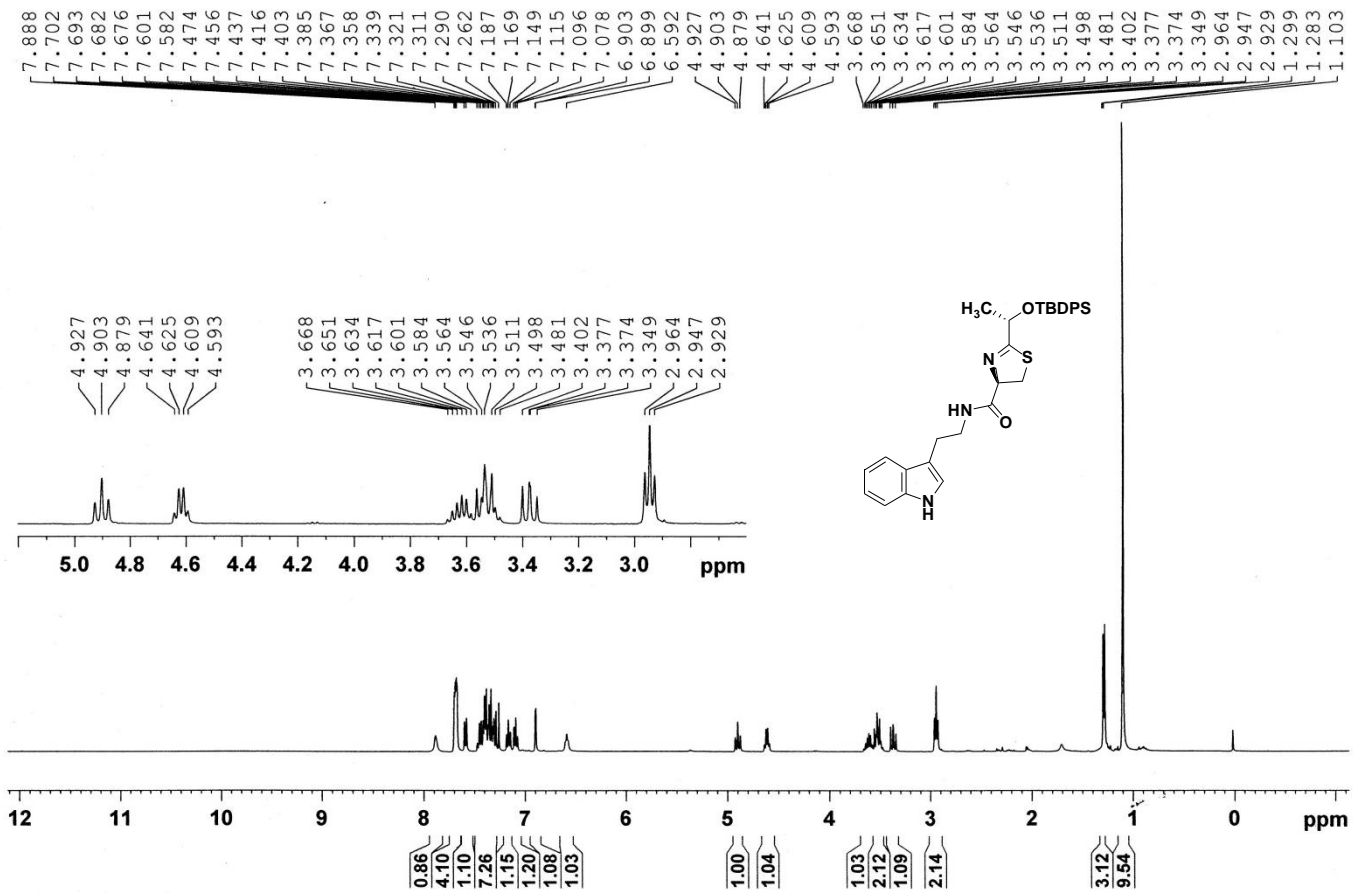

<sup>13</sup>C NMR (100MHz, CDCl<sub>3</sub>) spectrum of 8

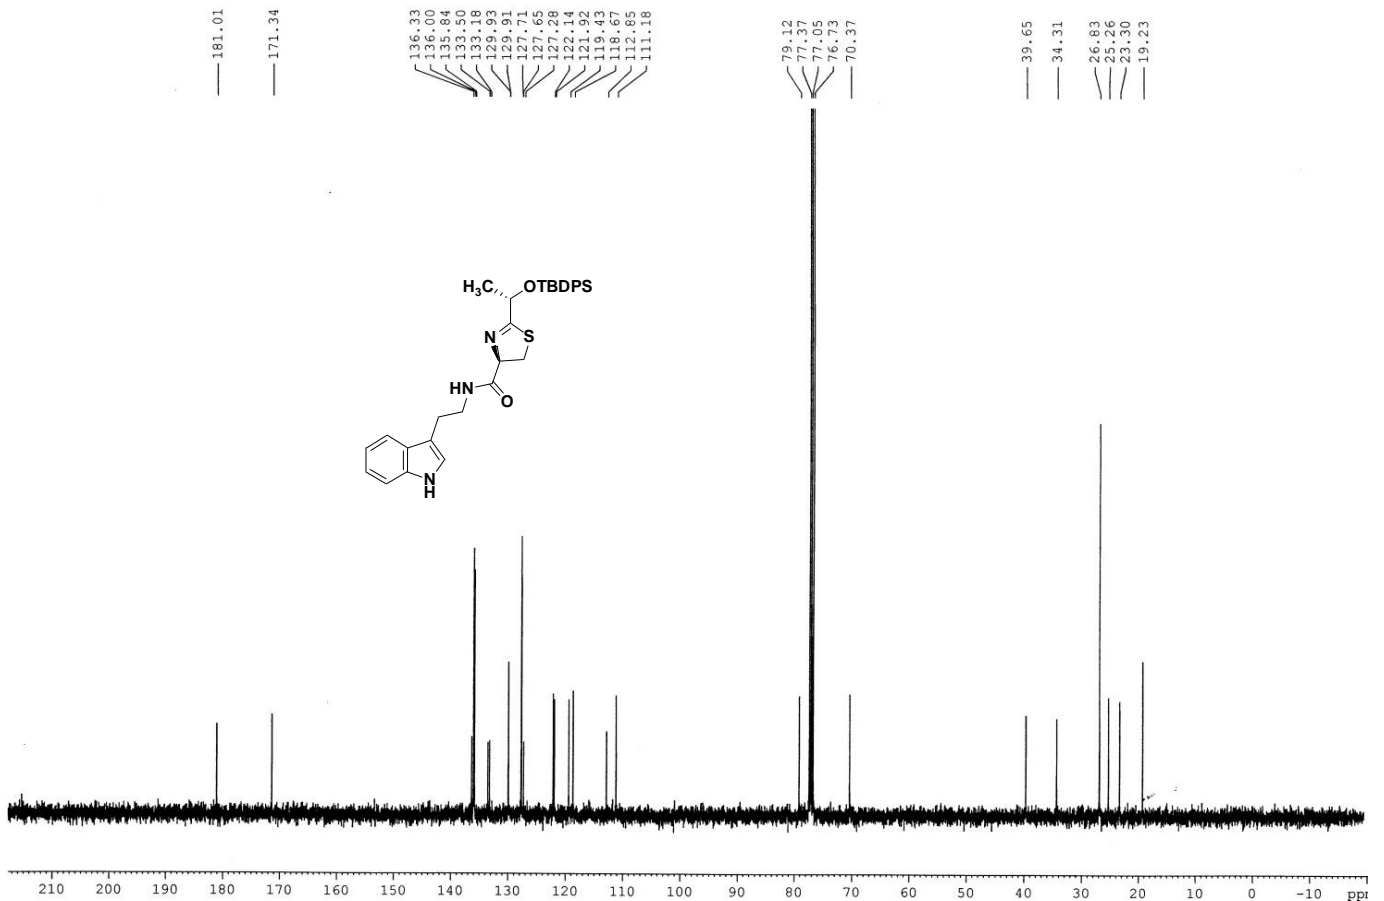

# $^1\text{H}$ NMR (400MHz, $\text{CDCl}_3$ ) spectrum of (*R*)-thiazoline

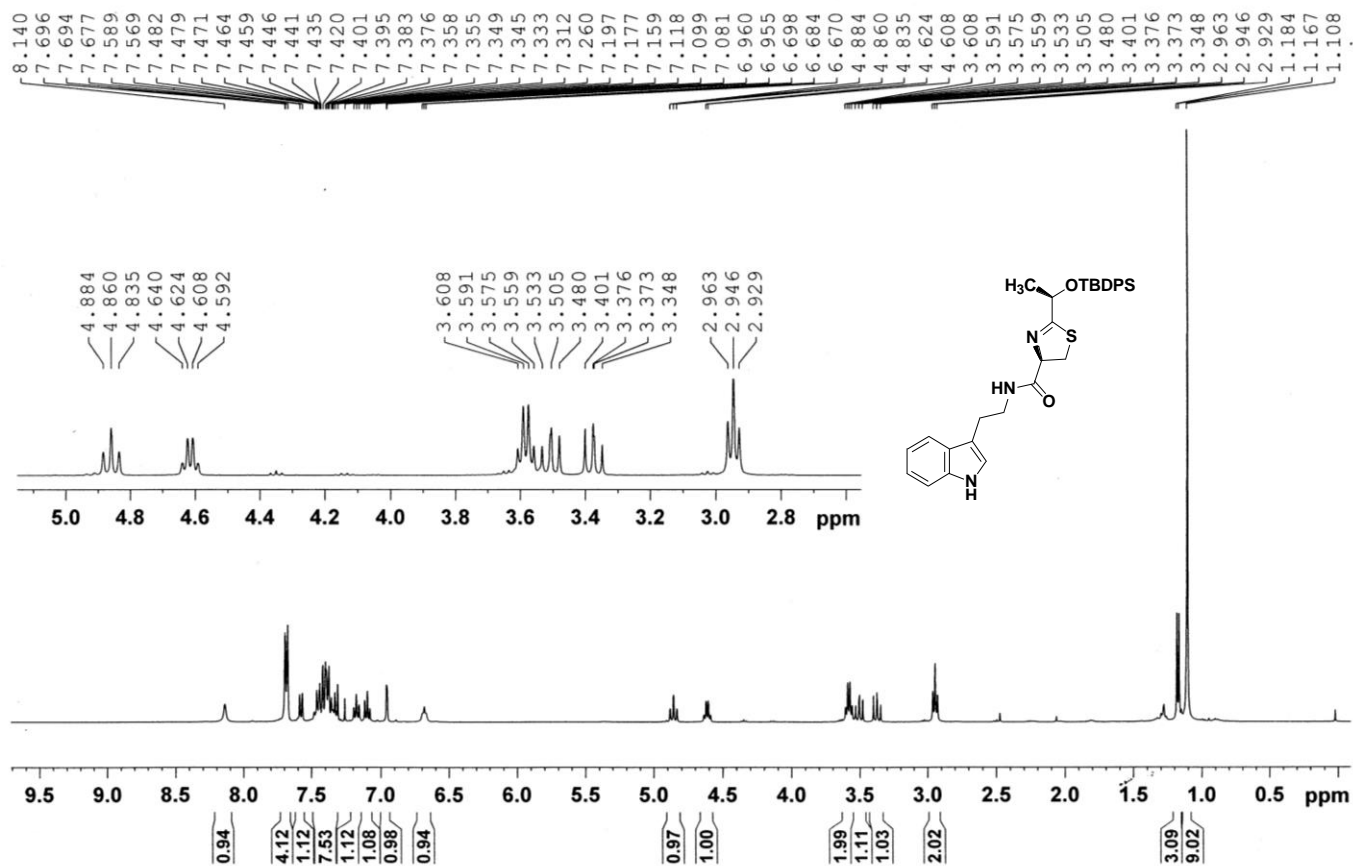

# $^{13}\text{C}$ NMR (100MHz, $\text{CDCl}_3$ ) spectrum of (*R*)-thiazoline

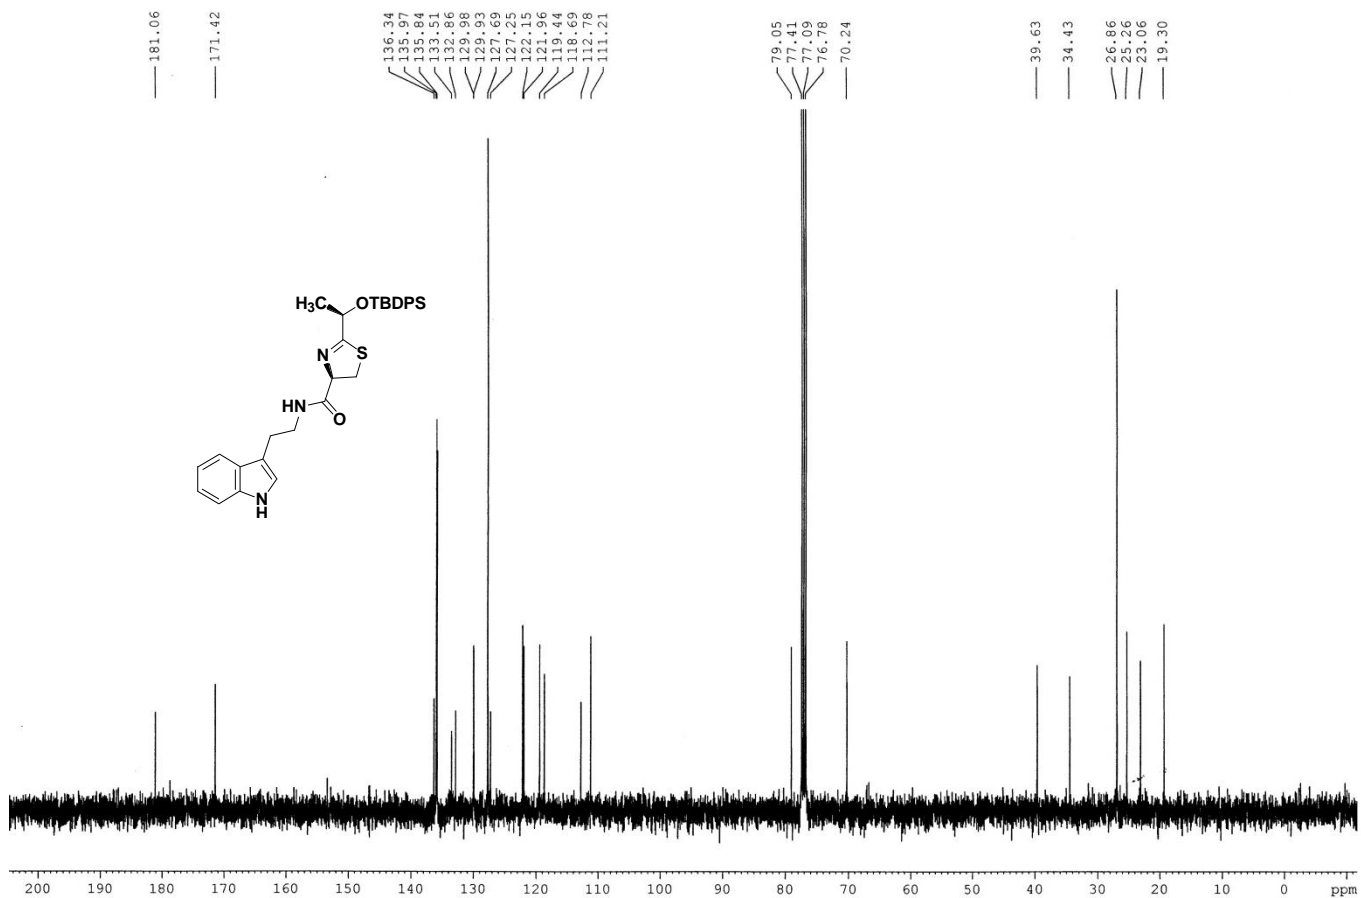



# <sup>1</sup>H NMR (400MHz, CDCl<sub>3</sub>) spectrum of 9

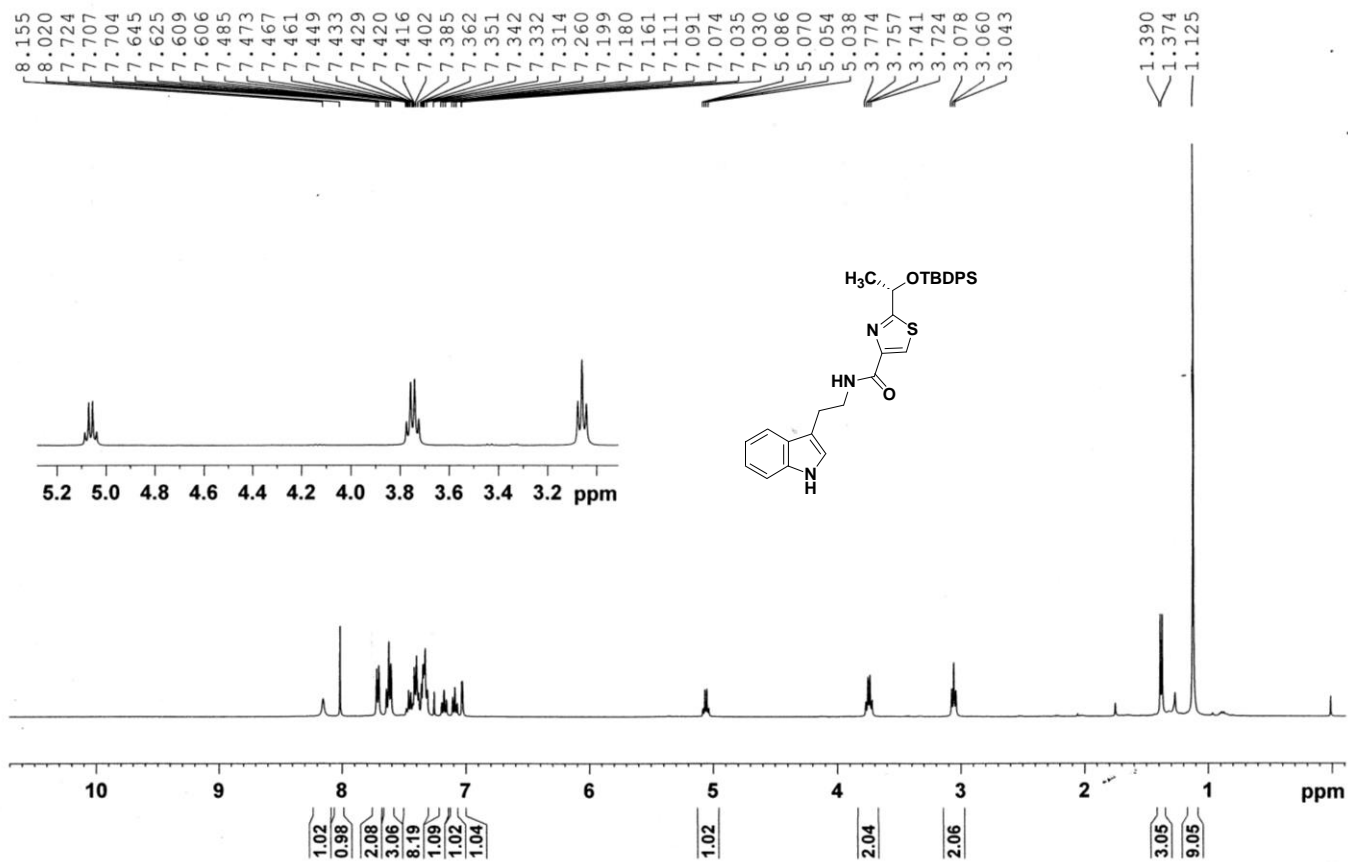

# <sup>13</sup>C NMR (100MHz, CDCl<sub>3</sub>) spectrum of 9

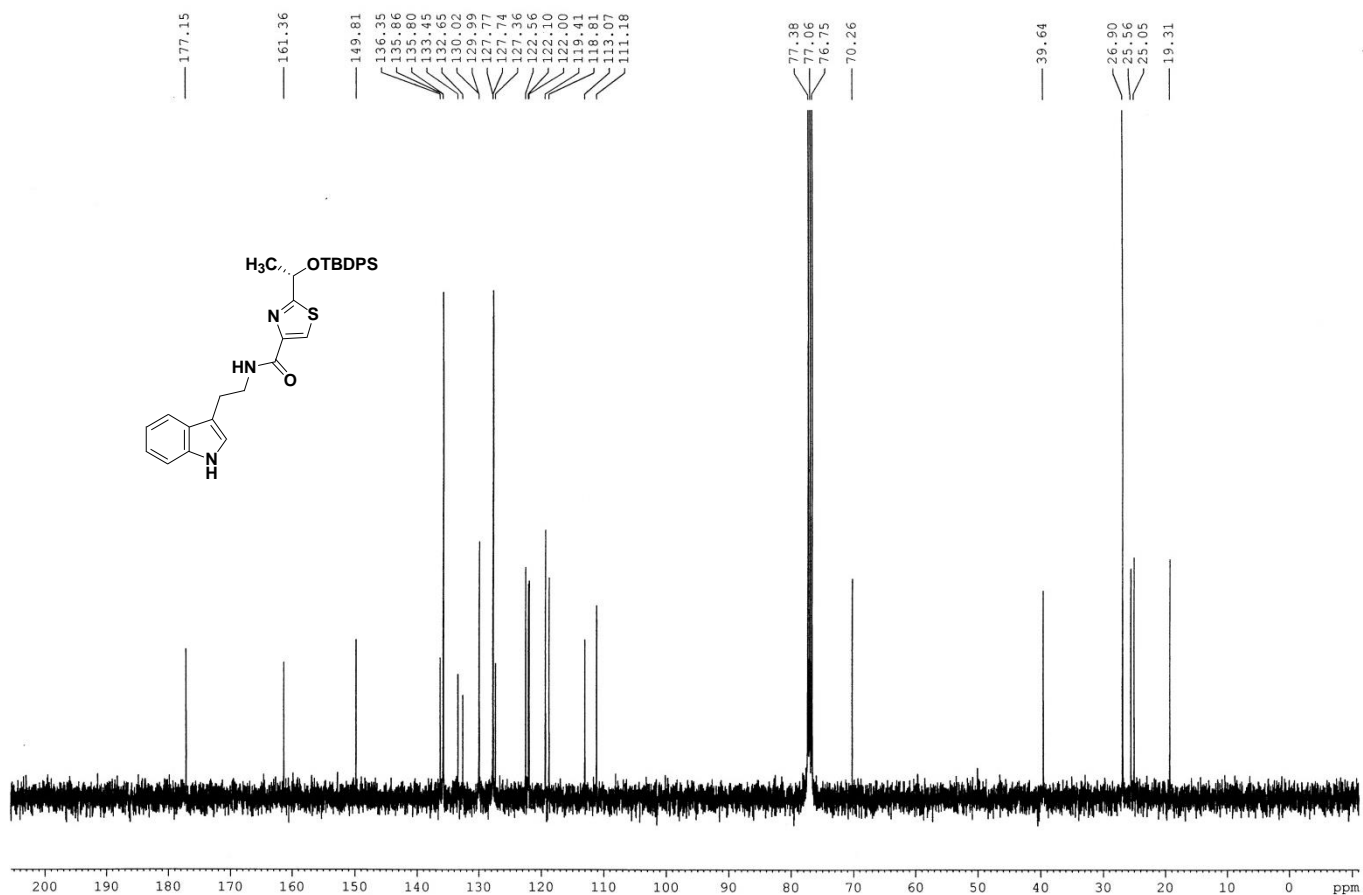

# $^1\text{H}$ NMR (400MHz, $\text{DMSO-d}_6$ ) spectrum of (*S*)-Bacillamide B (2)

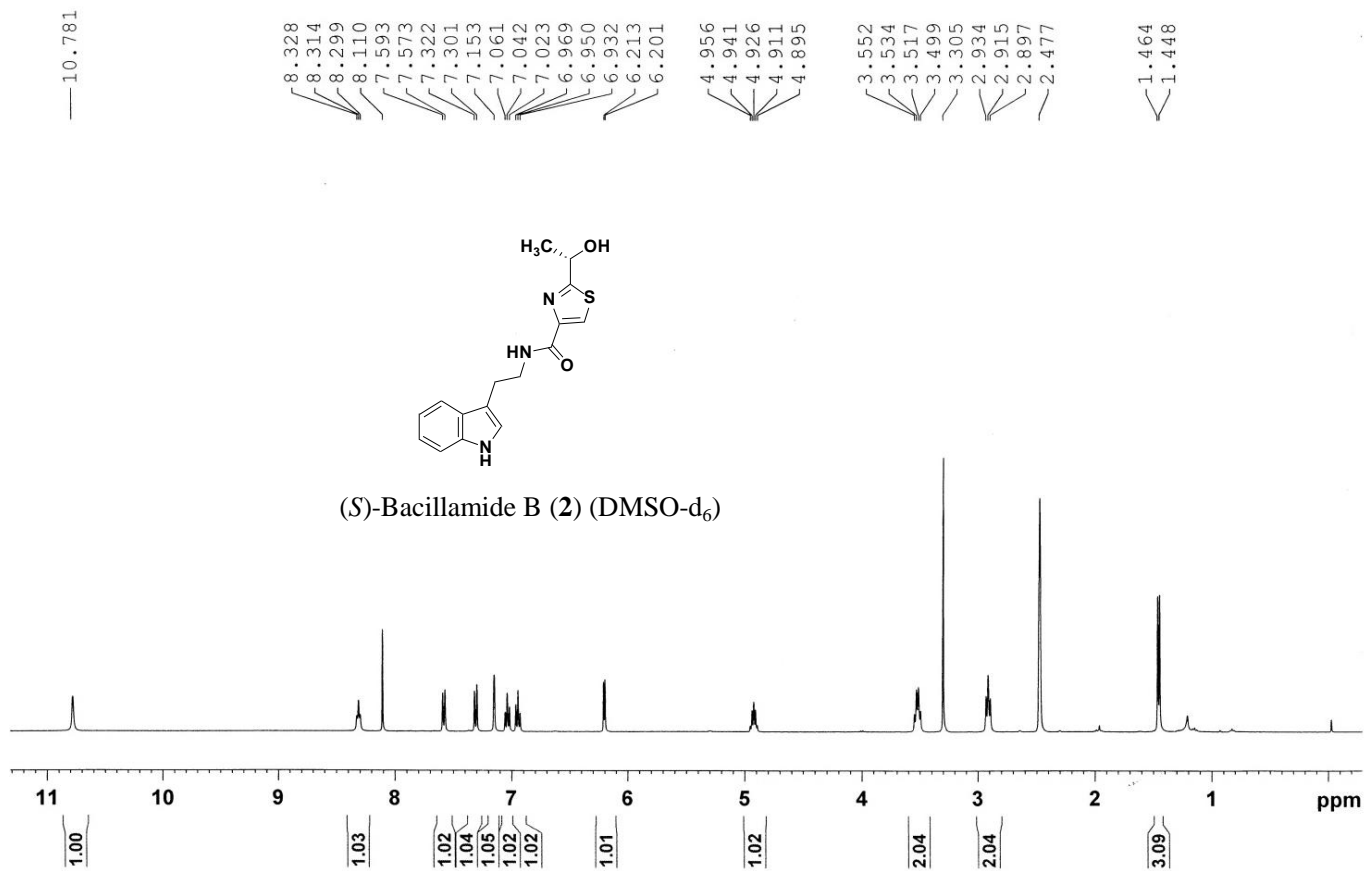

# $^{13}\text{C}$ NMR (100MHz, $\text{DMSO-d}_6$ ) spectrum of (*S*)-Bacillamide B (2)

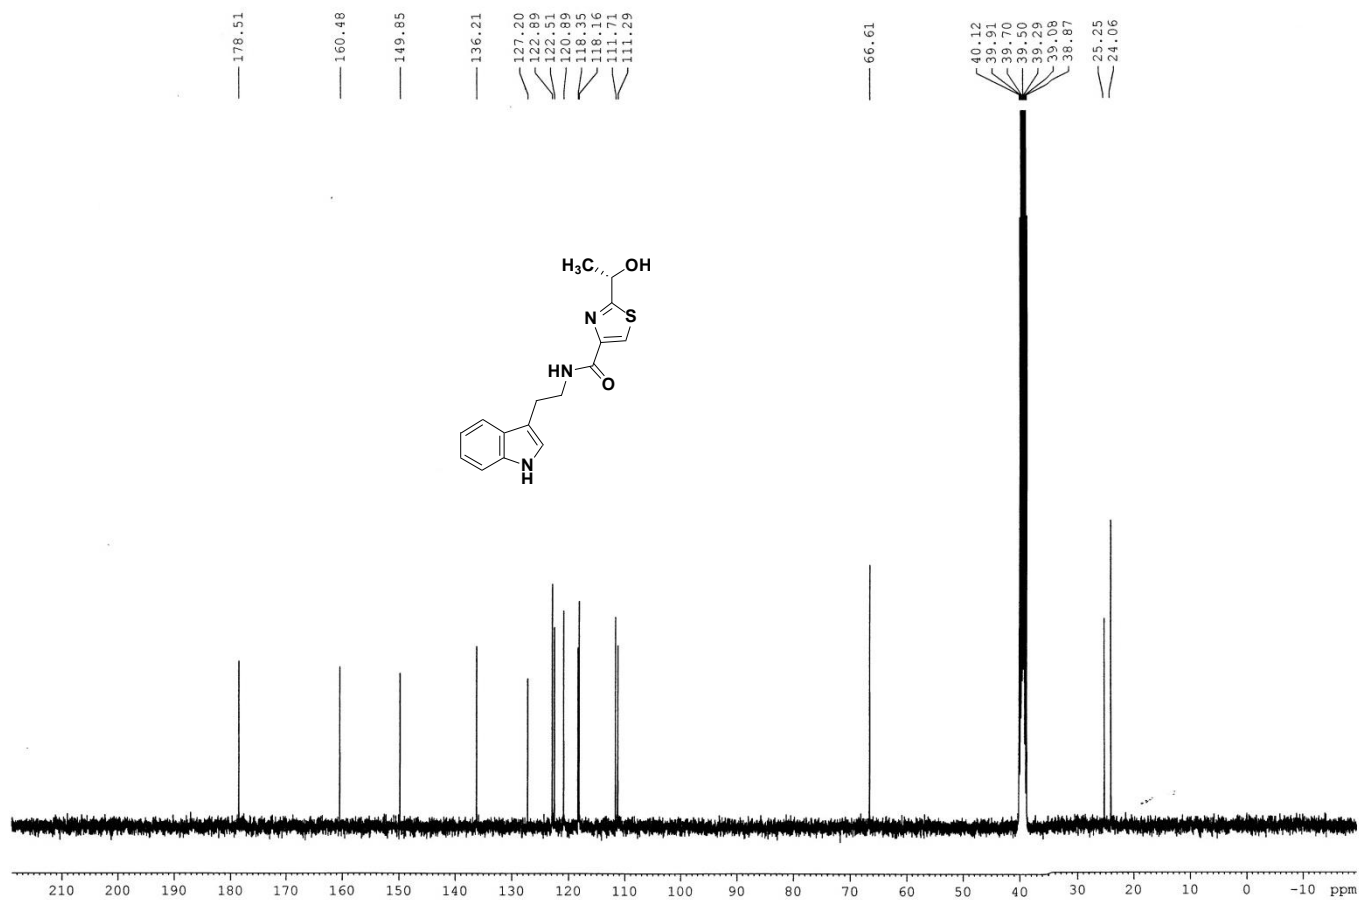

**H-H COSY (400MHz, DMSO-d<sub>6</sub>) spectrum of (S)-Bacillamide B (2)**

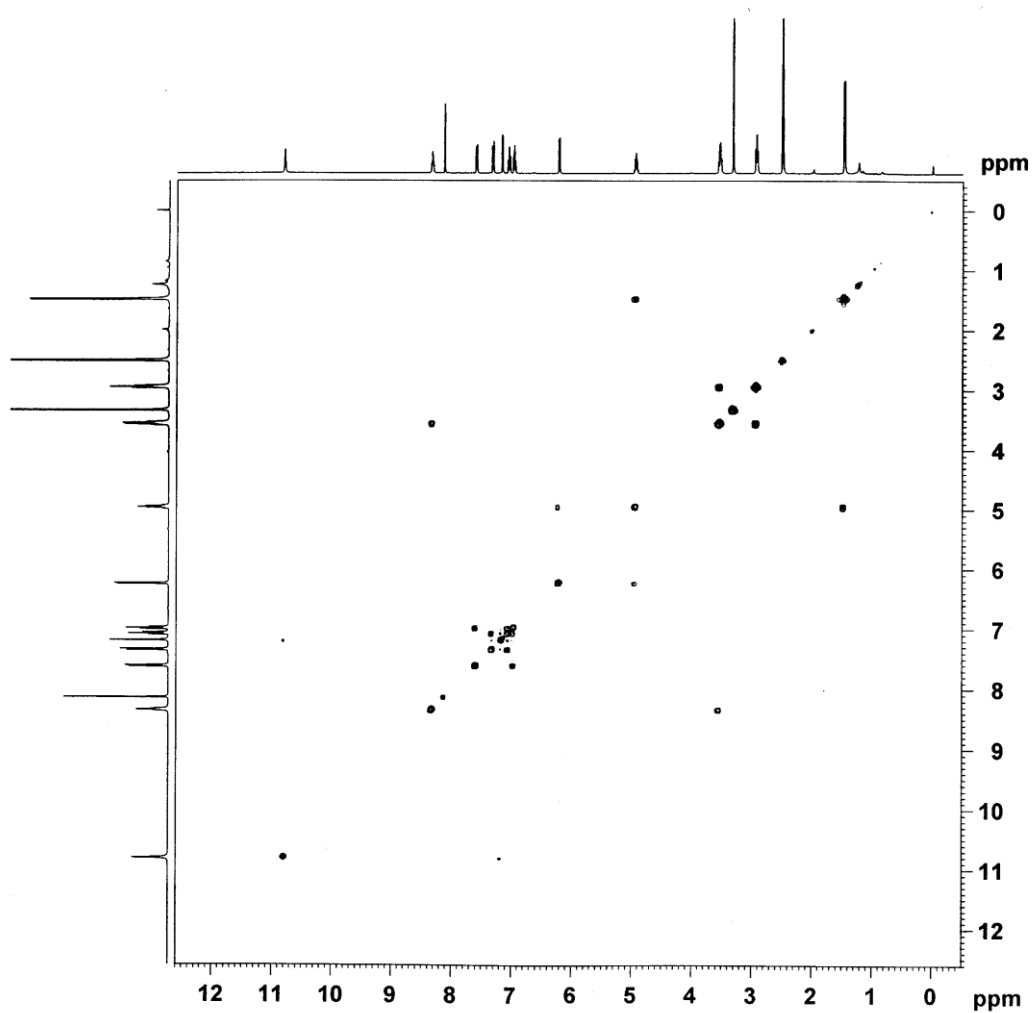

**<sup>1</sup>H NMR (400MHz, DMSO-d<sub>6</sub>) spectrum of Bacillamide A (1)**

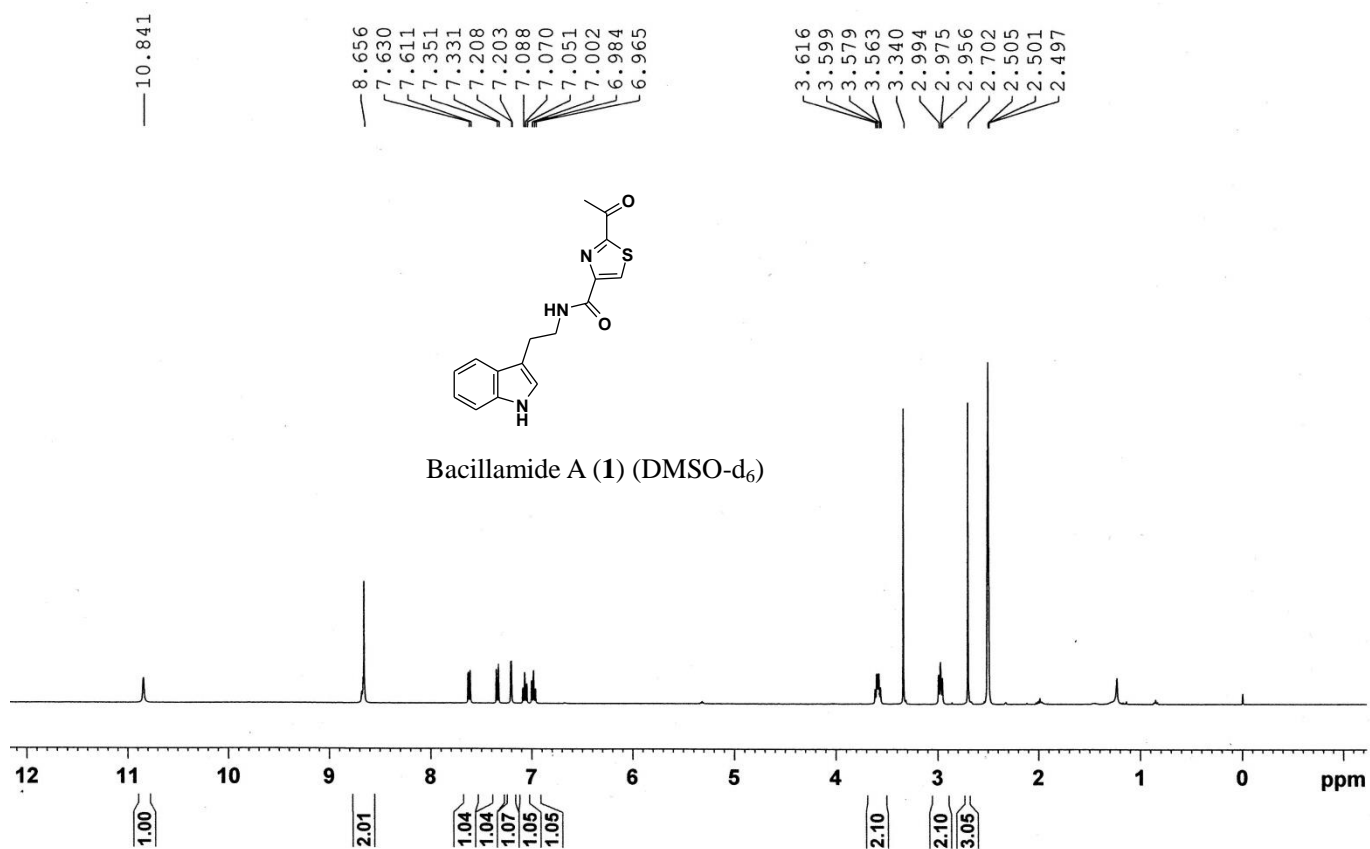

# <sup>13</sup>C NMR (100MHz, DMSO-d<sub>6</sub>) spectrum of Bacillamide A (1)

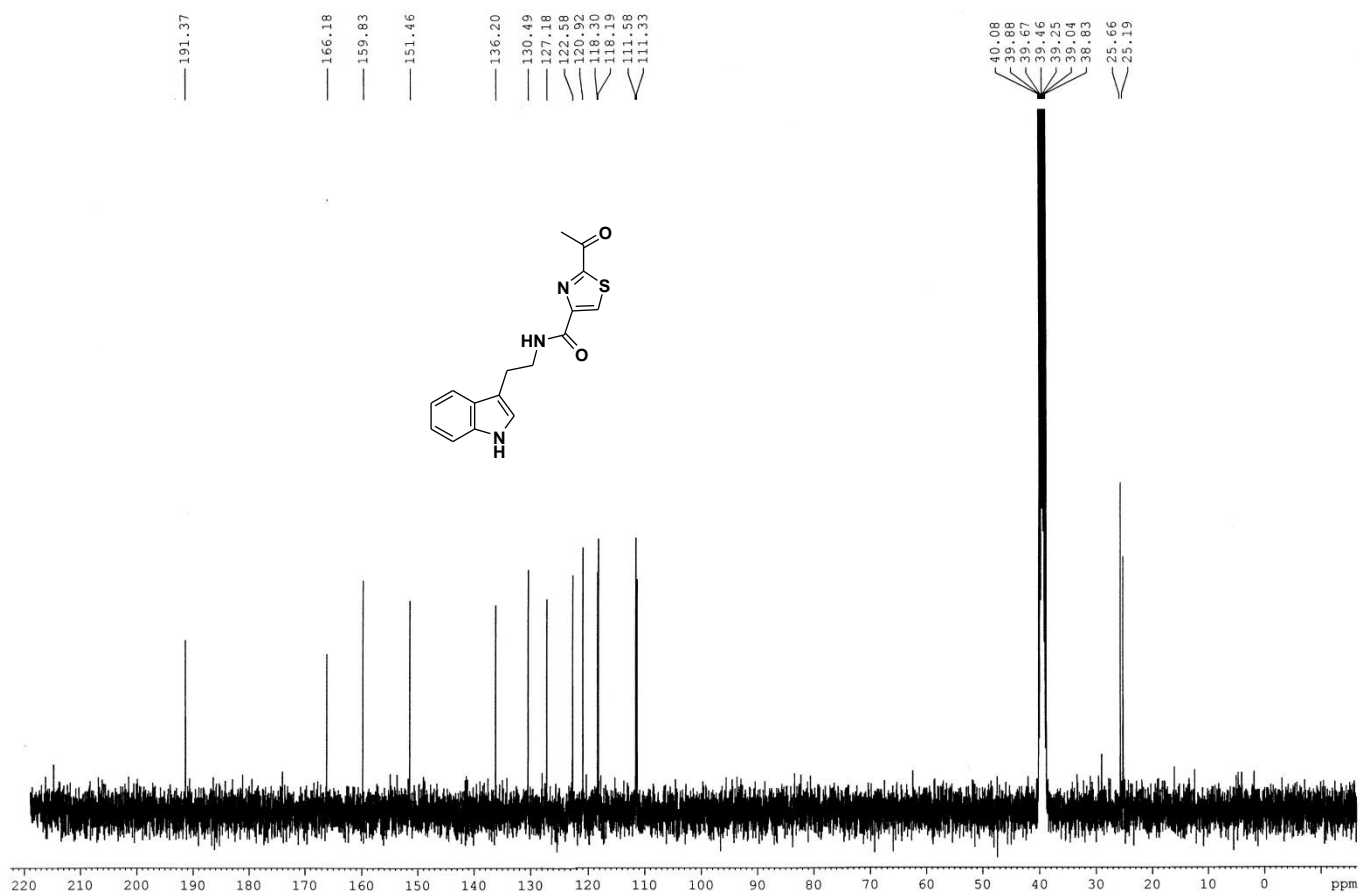

# H-H COSY (400MHz, DMSO-d<sub>6</sub>) spectrum of Bacillamide A (1)

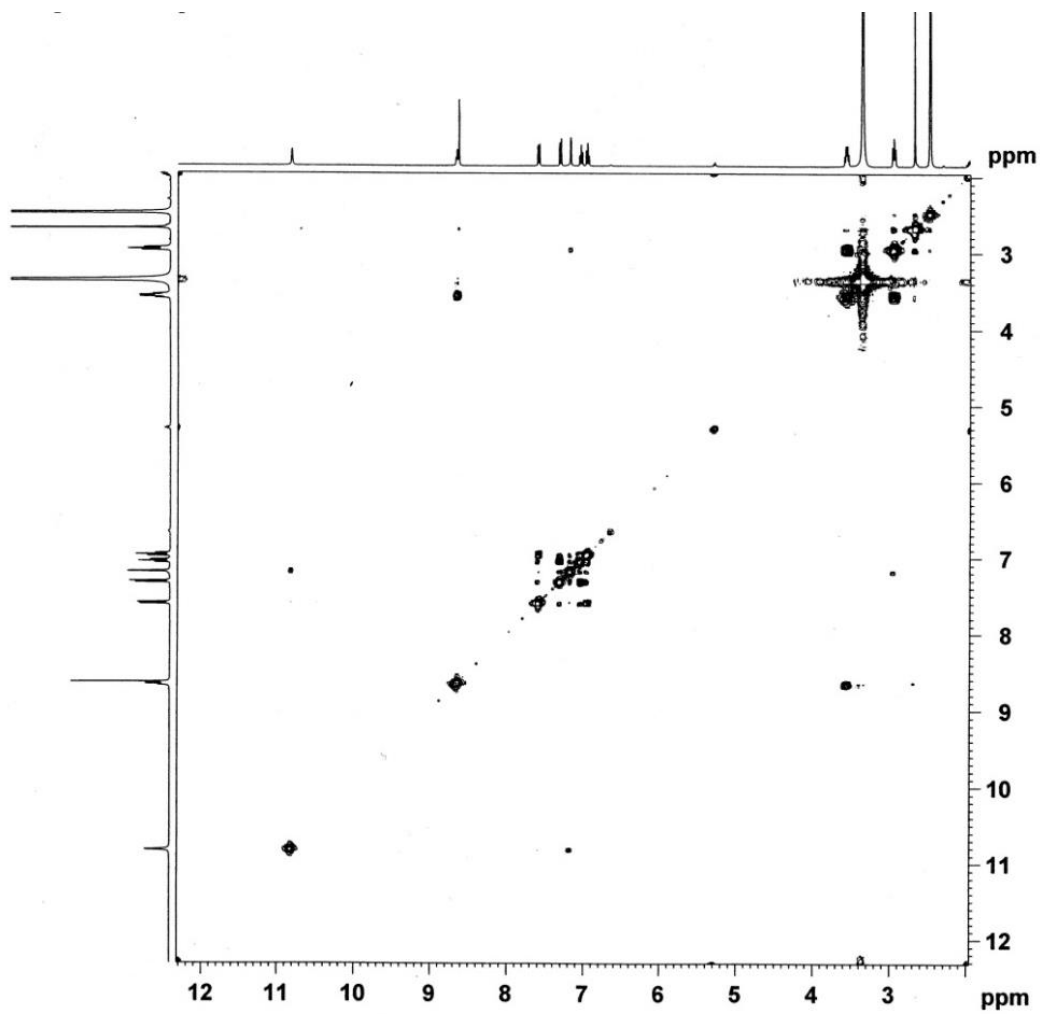

<sup>1</sup>H NMR (400MHz, CDCl<sub>3</sub>) spectrum of 13

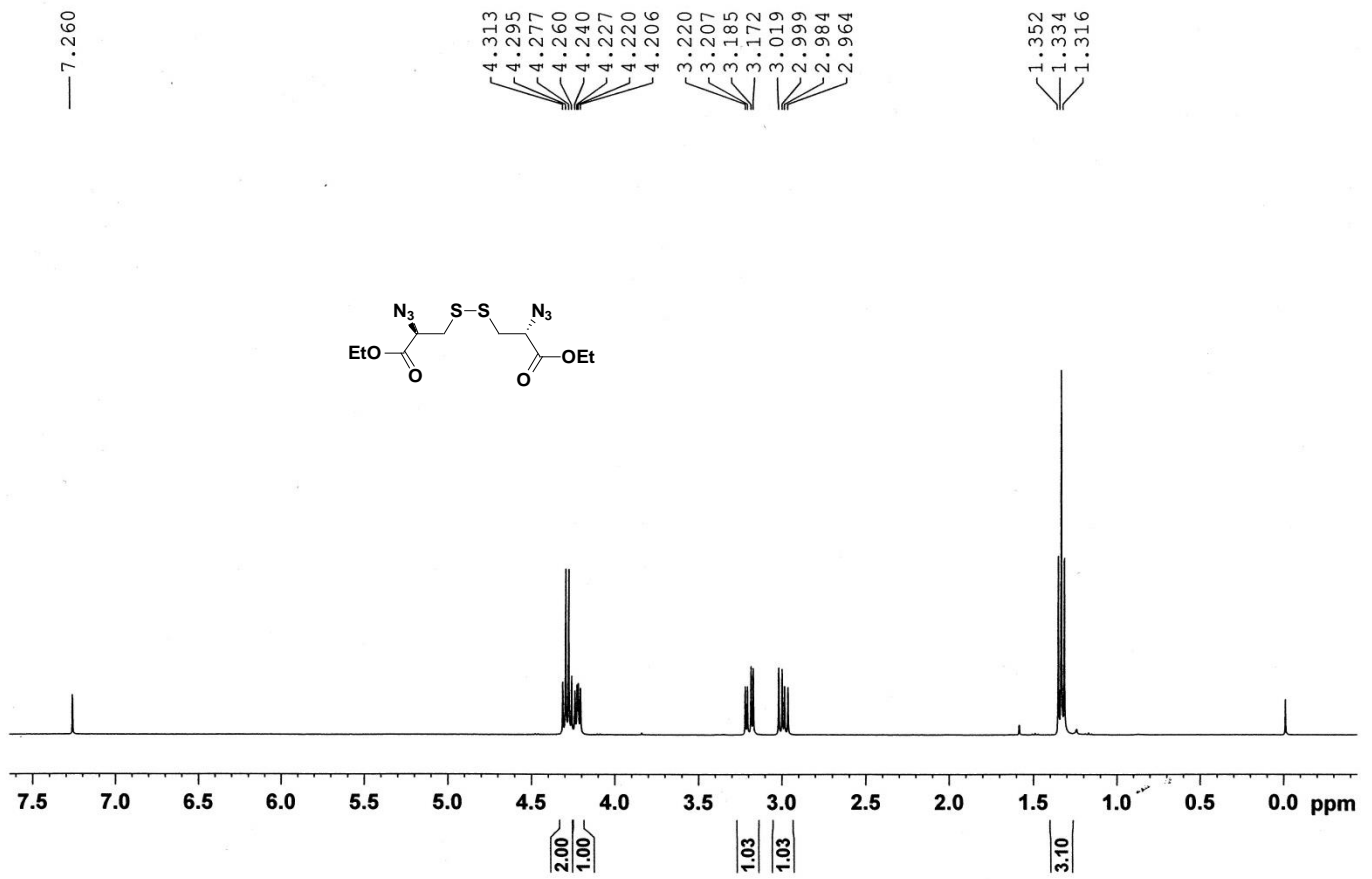

<sup>13</sup>C NMR (100MHz, CDCl<sub>3</sub>) spectrum of 13

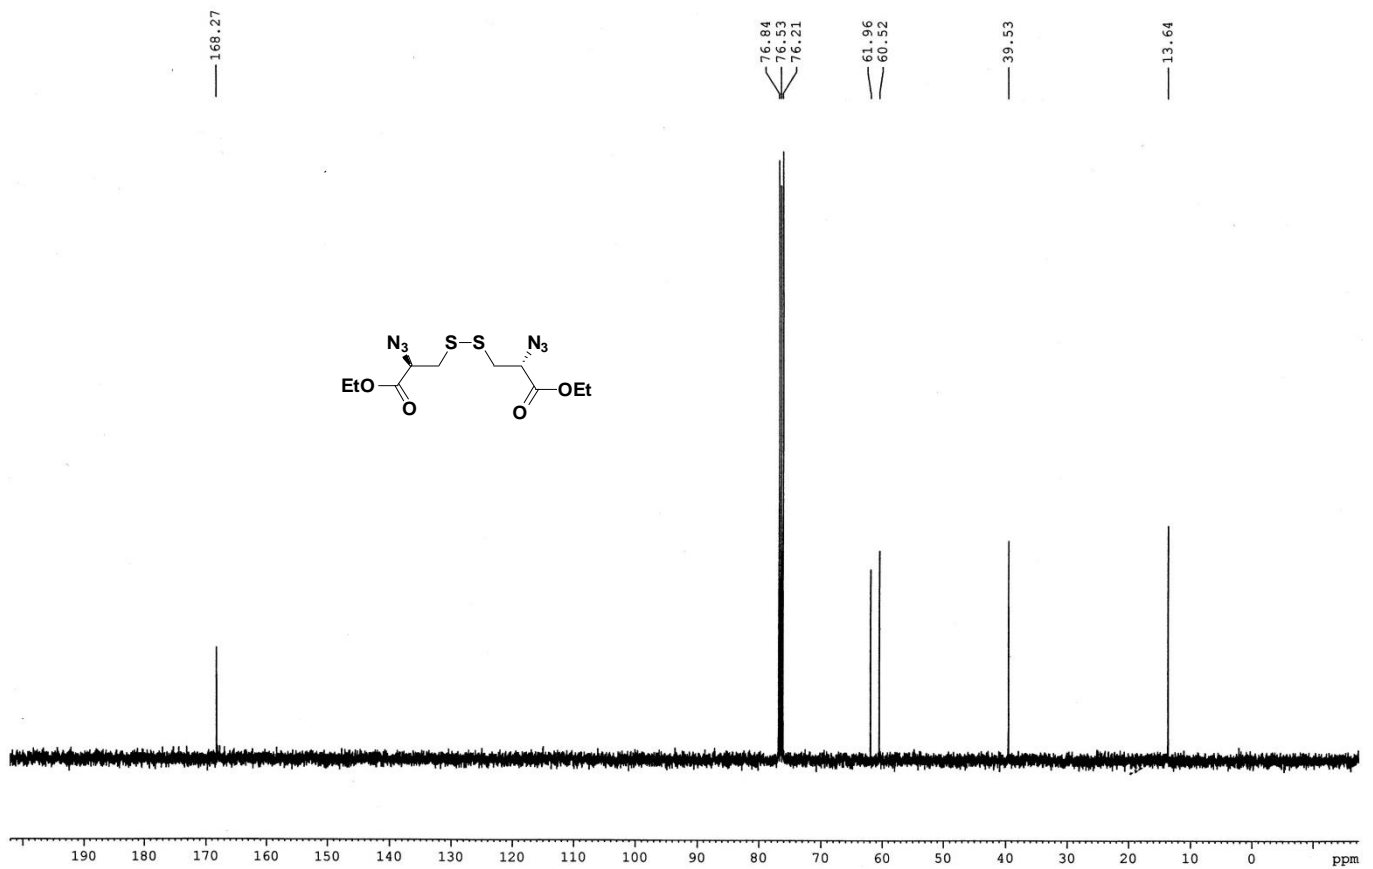

# <sup>1</sup>H NMR (400MHz, CDCl<sub>3</sub>) spectrum of 14

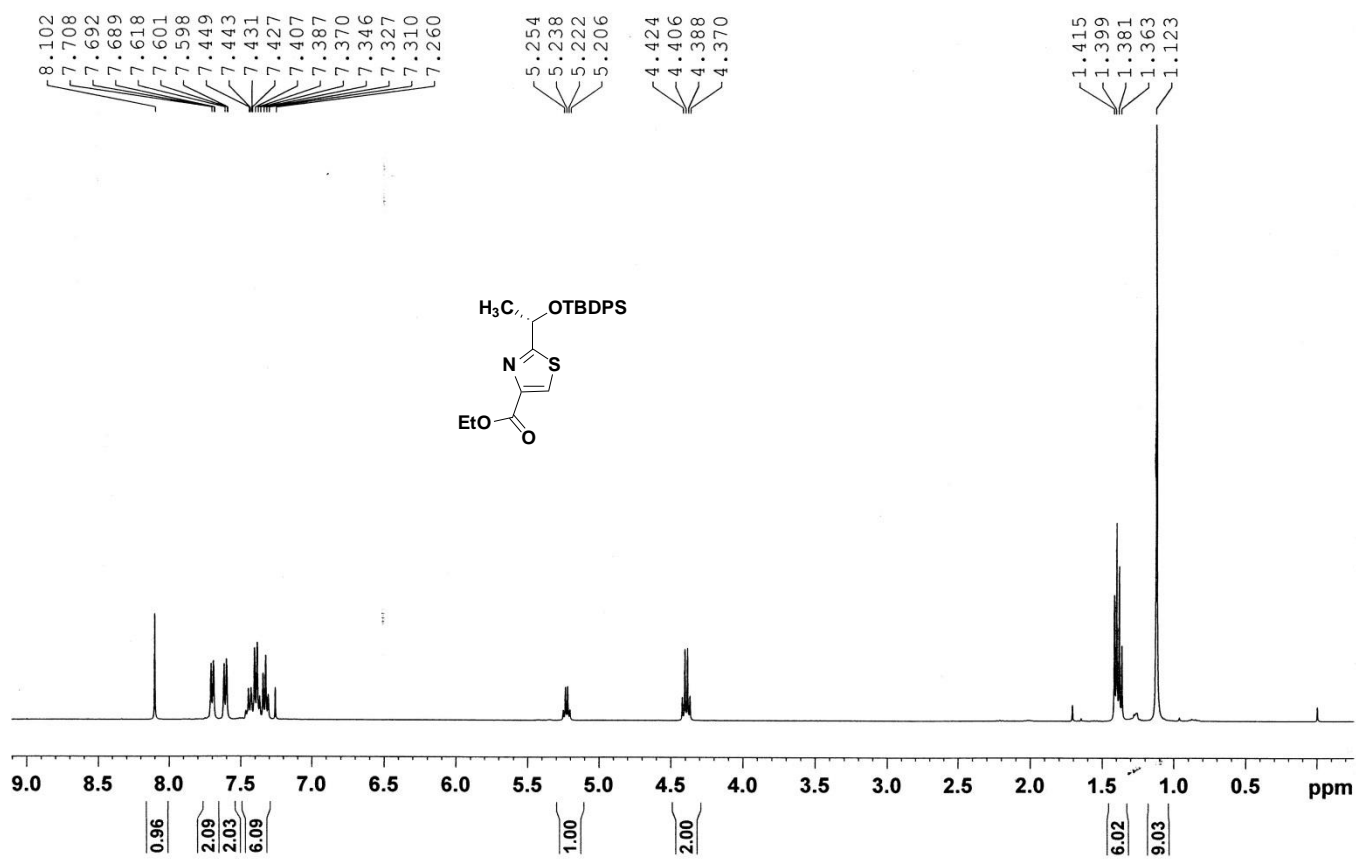

# <sup>13</sup>C NMR (100MHz, CDCl<sub>3</sub>) spectrum of 14

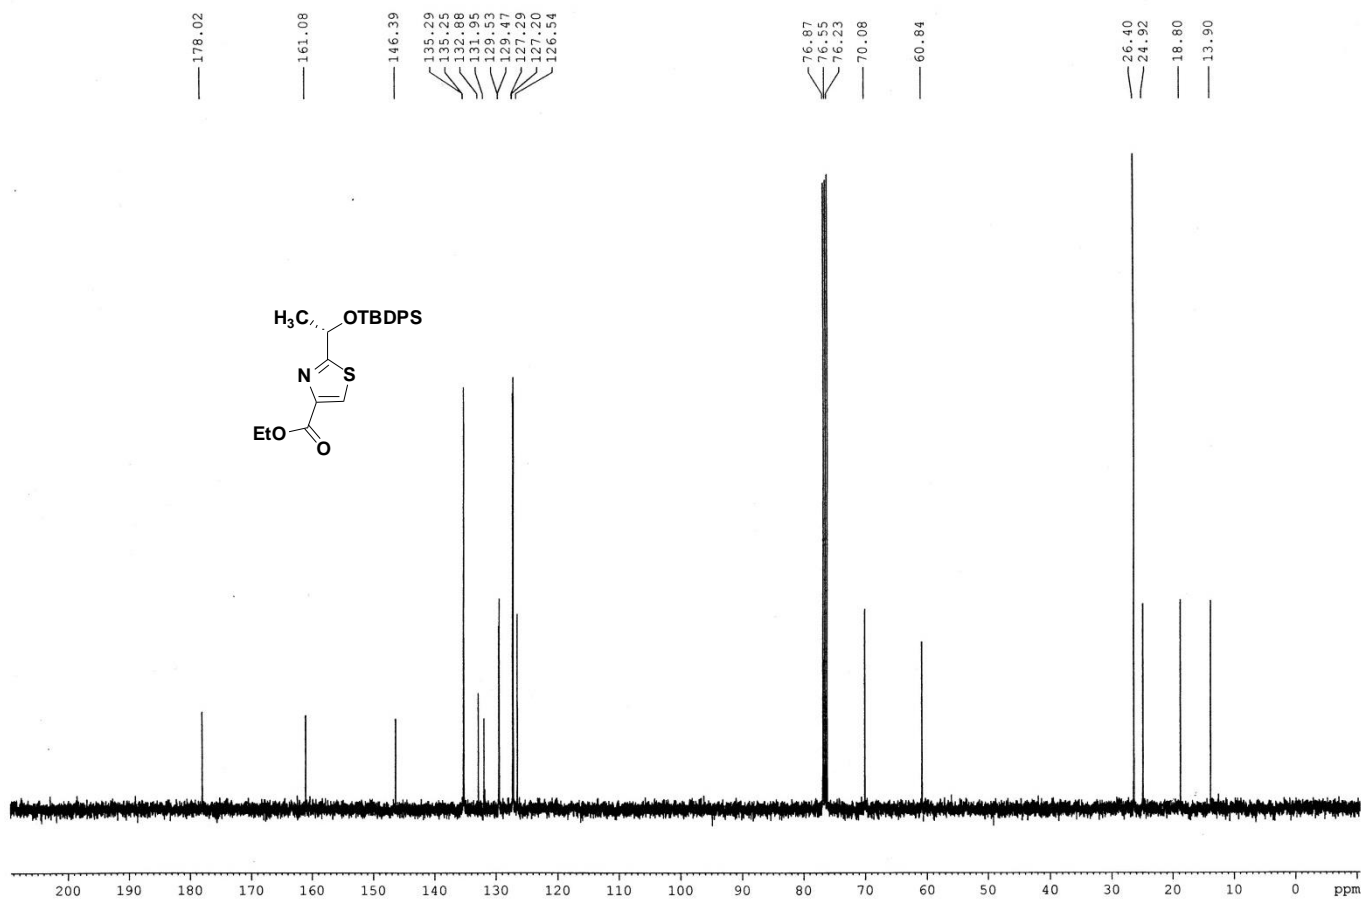

<sup>1</sup>H NMR (400MHz, CDCl<sub>3</sub>) spectrum of 15

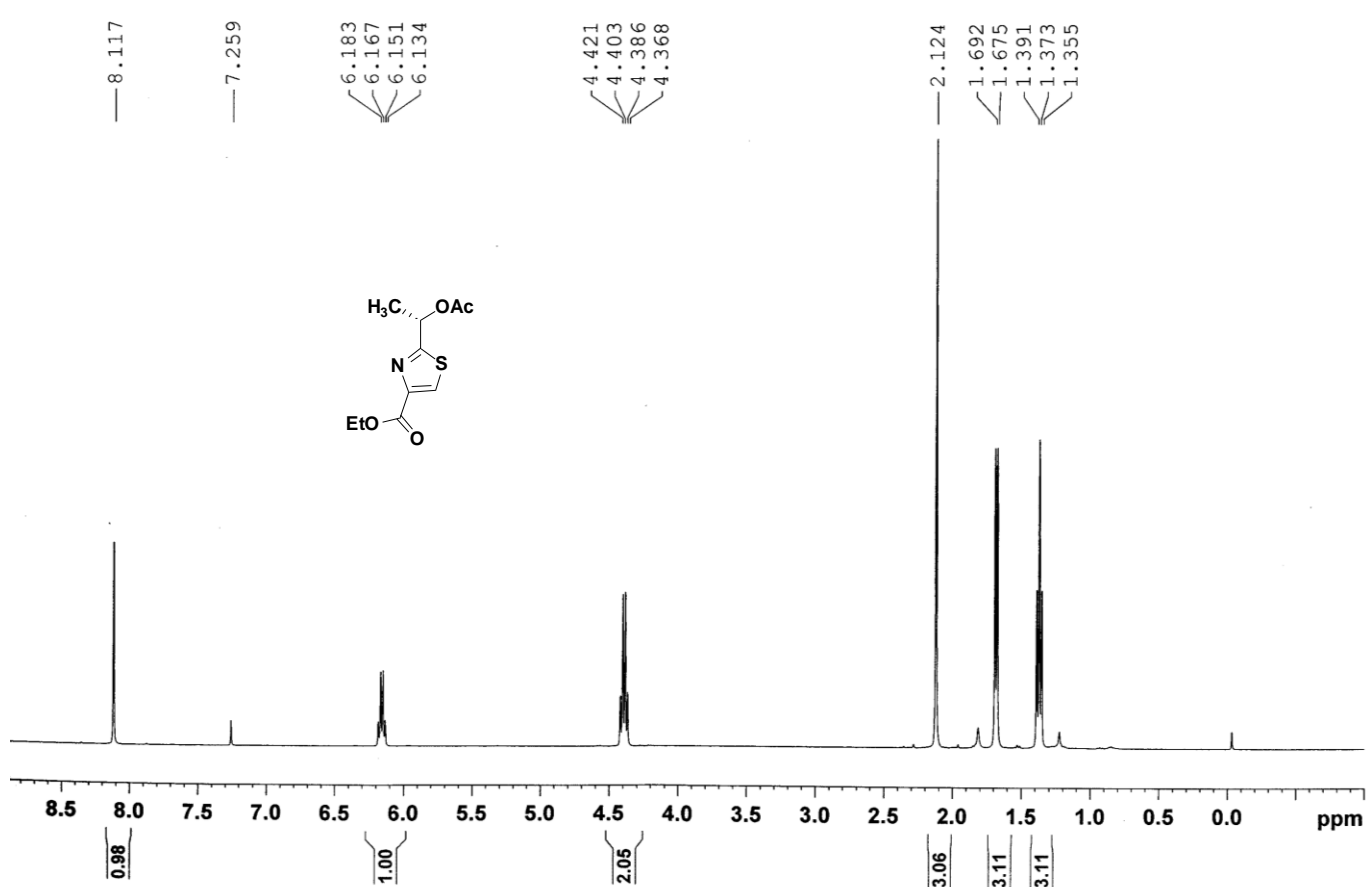

<sup>13</sup>C NMR (100MHz, CDCl<sub>3</sub>) spectrum of 15

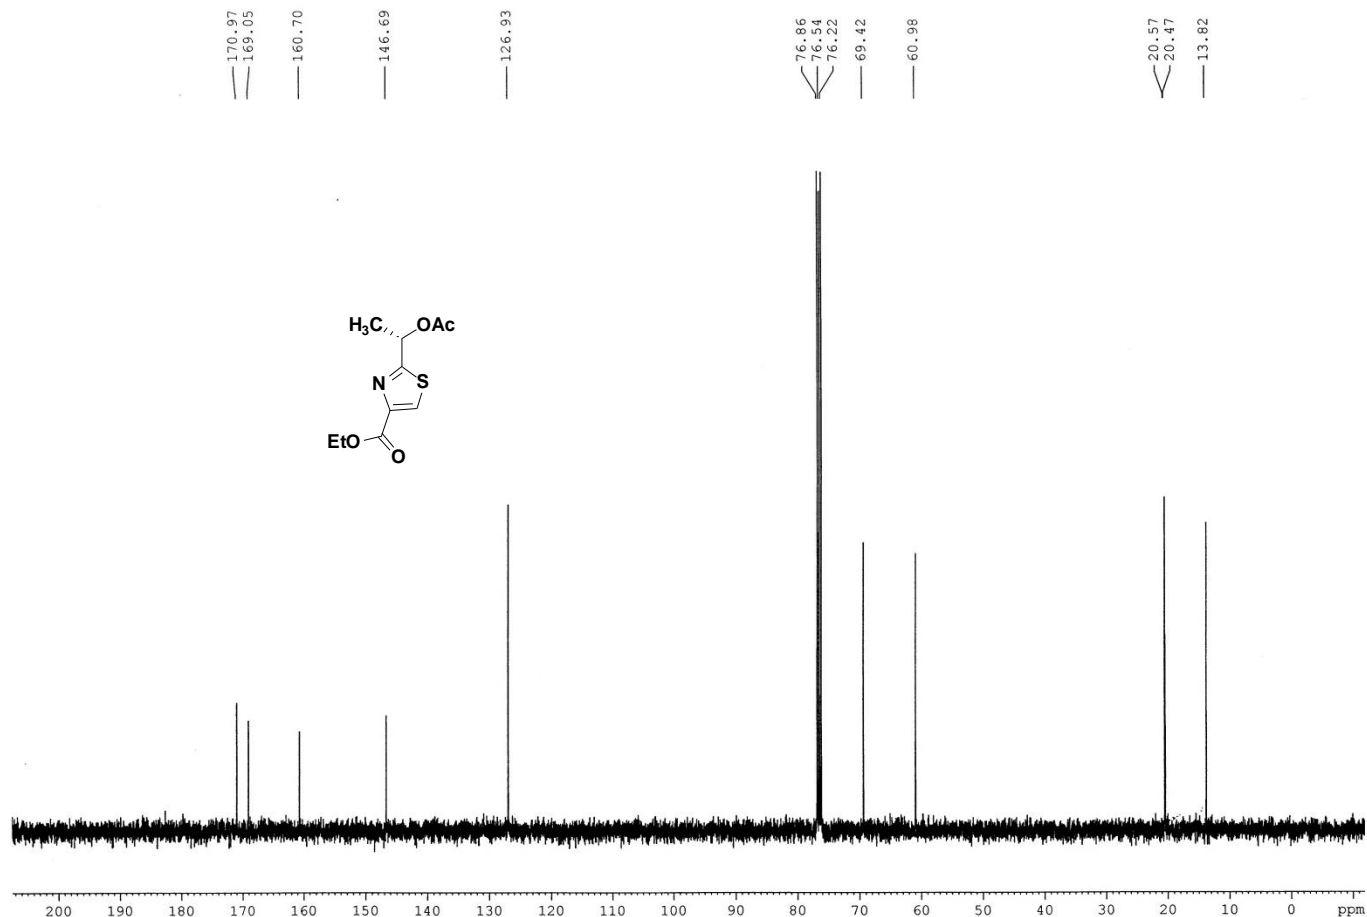

# $^1\text{H}$ NMR (400MHz, $\text{DMSO-d}_6$ ) spectrum of (*R*)-Bacillamide B (12)

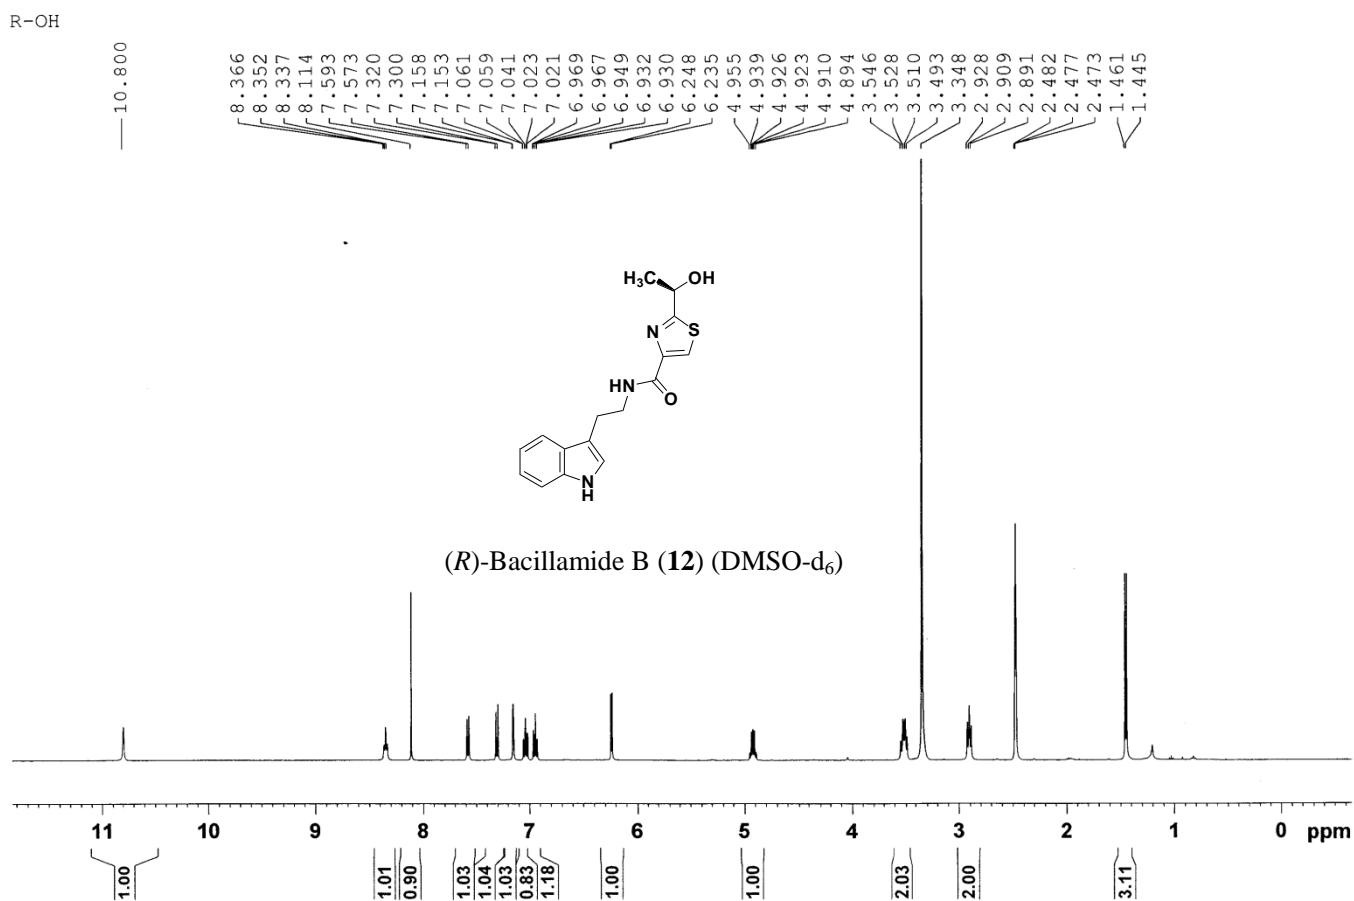

# $^{13}\text{C}$ NMR (100MHz, $\text{CDCl}_3$ ) spectrum of (*R*)-Bacillamide B (12)

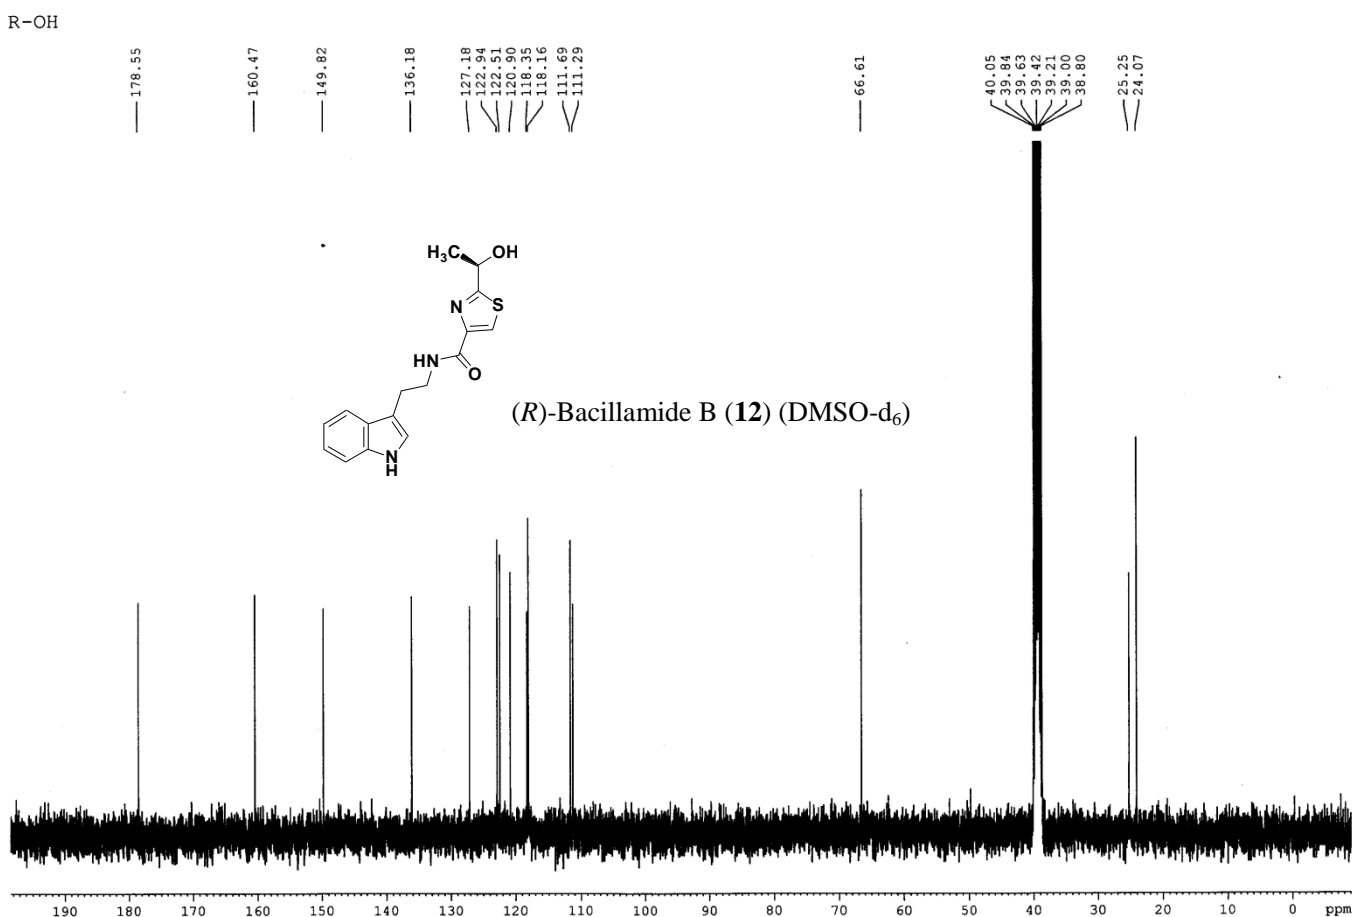

Supplement: c5ob00093a1.pdf [file c5ob00093a1.pdf]
